# Supplementary material
Source: PubMed Central journal article supplement (PMC7302978)
Supplement: NIHMS1593535-supplement-Sup_info.pdf [file NIHMS1593535-supplement-Sup_info.pdf]

## **SUPPLEMENTAL MATERIAL**

### **Inhibition of urea transporter ameliorates uremic cardiomyopathy in mice with chronic kidney disease**

Akihiro Kuma<sup>1,2</sup>, Xiaonan H. Wang<sup>1\*</sup>, Janet D. Klein<sup>1</sup>, Lin Tan<sup>3</sup>, Nawazish Naqvi<sup>3</sup>, Ying Huang<sup>1</sup>, Manshu Yu<sup>1,4</sup>, Fitra Rianto<sup>1</sup>, Jeff M. Sands<sup>1\*</sup>

<sup>1</sup>Renal Division, Department of Medicine, Emory University School of Medicine, Atlanta, GA, U.S.A.

<sup>2</sup>Second Department of Internal Medicine, School of Medicine, University of Occupational and Environmental Health, Kitakyushu, Japan.

<sup>3</sup>Division of Cardiology, Department of Medicine, Emory University School of Medicine, Atlanta, GA, U.S.A.

<sup>4</sup>Renal Division, Affiliated Hospital of Nanjing University of Chinese Medicine, Nanjing, Jiangsu, 210029, China

**Supplementary Table 1. The primers for quantitative PCR**

| Name          | Sequence                 | Amplicon (bp) | Code           |
|---------------|--------------------------|---------------|----------------|
| Collagen 1a1  |                          |               |                |
| Forward       | GAGCGGAGAGTACTGGATCG     | 204           | NM_007742.4    |
| Reverse       | TACTCGAACGGGAATCCATC     |               |                |
| Collagen 4a1  |                          |               |                |
| Forward       | ATTCCTTTGTGATGCACACCAG   | 151           | NM_009931      |
| Reverse       | AAGCTGTAAGCATTCGCGTAGTA  |               |                |
| Fibronectin   |                          |               |                |
| Forward       | CGAGGTGACAGAGACCACAA     | 149           | NM_010233.2    |
| Reverse       | CTGGAGTCAAGCCAGACACA     |               |                |
| $\alpha$ -SMA |                          |               |                |
| Forward       | ACTGGGACGACATGGAAAAG     | 240           | NM_007392.3    |
| Reverse       | CATCTCCAGAGTCCAGCACA     |               |                |
| Agt           |                          |               |                |
| Forward       | TCTCCTTTACCACAACAAGAGCA  | 121           | NM_007428.4    |
| Reverse       | CTTCTCATTACAGGGGAGGT     |               |                |
| Renin         |                          |               |                |
| Forward       | CTCTCTGGGCACTCTTGTTGC    | 198           | NM_031192.3    |
| Reverse       | GGGAGGTAAGATTGGTCAAGGA   |               |                |
| Ace           |                          |               |                |
| Forward       | GGAGTACTTCCAACCGGTCA     | 147           | NM_207624      |
| Reverse       | GCCTTGGCTTCATCAGTCTC     |               |                |
| Agtr1         |                          |               |                |
| Forward       | CTGTGGCCAGTGTCTTTCT      | 161           | NM_177322      |
| Reverse       | GCGTAGAGGTTGAAACTGA      |               |                |
| Agtr2         |                          |               |                |
| Forward       | AACTGGCACCAATGAGTCCG     | 209           | NM_007429.5    |
| Reverse       | CCAAAAGGAGTAAGTCAGCCAAG  |               |                |
| MR            |                          |               |                |
| Forward       | GAAAGGCGCTGGAGTCAAGT     | 127           | NM_001083906.2 |
| Reverse       | TGTTCCGAGTAGCACCGGAA     |               |                |
| Mas           |                          |               |                |
| Forward       | AGAAATCCCTTCACGGTCTACA   | 146           | NM_008552.5    |
| Reverse       | GTCACCGATAATGTCACGATTGT  |               |                |
| UT-B          |                          |               |                |
| Forward       | CCAACATCACGTGGTCTGA      | 61            | AF448798       |
| Reverse       | ACTCCCACCGGAAGAGACTT     |               |                |
| 18s           |                          |               |                |
| Forward       | CCAGAGCGAAAGCATTTGCCAAGA | 101           | X00686         |
| Reverse       | TCGGCATCGTTTATGGTCGGAAC  |               |                |

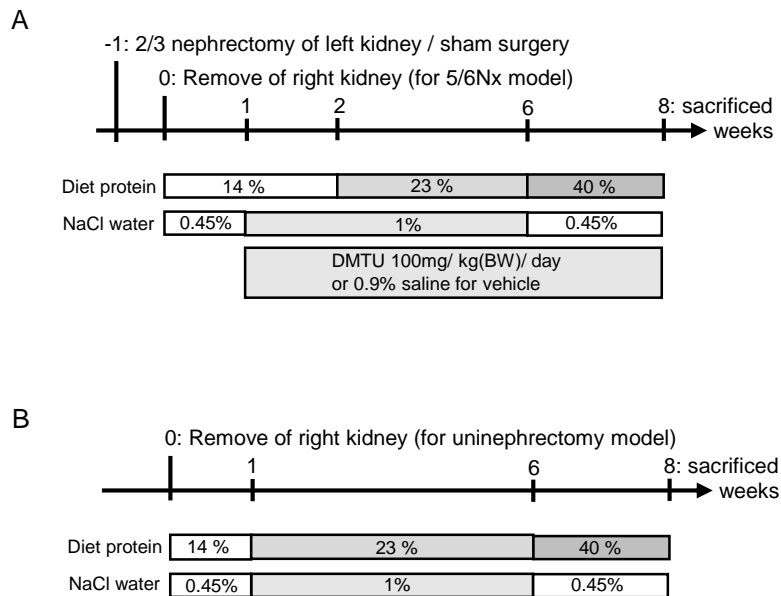

**Supplementary Figure 1. Animal experimental protocol:**

(A) Experiment of C57BL/6J wild type mice. Mice underwent 5/6 nephrectomy (5/6Nx) or sham surgery. Mice were fed 14% protein diet (0 weeks to 2 weeks), 23% protein diet (2 weeks to 6 weeks), and 40% protein diet (6 weeks to 8 weeks), and 0.9% saline for vehicle or dimethylthiourea (DMTU; UT-A inhibitor) was administered. (B) Experiment of C57BL/6J wild type and *UT-A1/A3<sup>-/-</sup>* mice. Mice underwent uninephrectomy (Nx) or sham surgery. Mice were fed 14% protein diet (0 weeks to 1 week), 23% protein diet (1 weeks to 6 weeks), and 40% protein diet (6 weeks to 8 weeks). For both experiments, mice drank 1% NaCl water one week to six weeks after second surgery.

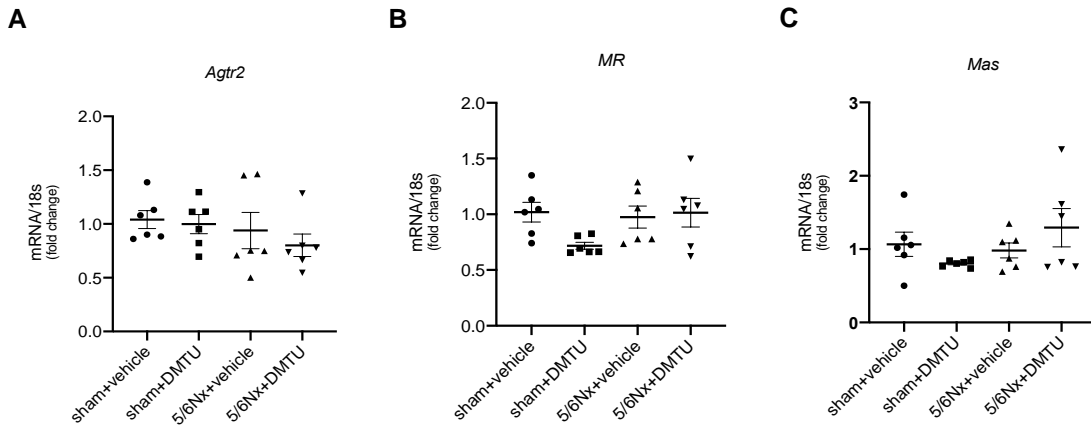

**Supplementary Figure 2. Renin-angiotensin system related genes in mouse hearts :**

Quantitative mRNA expression in mouse hearts performed by real-time PCR. All gene expressions were calculated by  $\Delta\Delta cq$  and standardized by housekeeping gene 18s. (A) *Agtr2*: angiotensin II receptor type2, (B) *MR*: mineralocorticoid receptor, (C) *Mas*: Mas receptor. All data; mean $\pm$ SEM ( $N=6$ ).

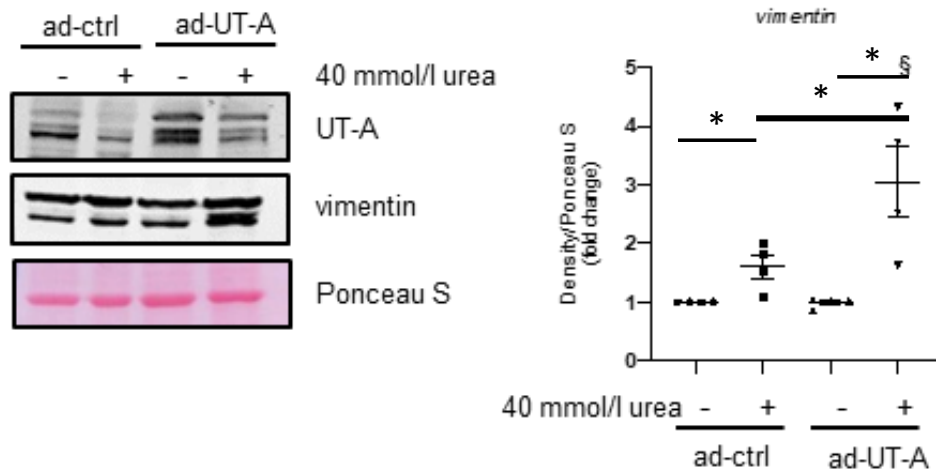

**Supplementary Figure 3. The effect of urea on vimentin protein amount with or without upregulation of UT.**

H9c2 cardiac myoblasts transduced with control adenovirus (ad)-GFP and ad-UT-A/GFP in normal medium, respectively. Protein was isolated after 48 hours after virus transduction. Western blot of lysates from H9c2 cells was performed to analyse UT and vimentin protein abundance. Data; mean $\pm$ SEM ( $N=4$ ). \* $P < 0.005$ , by two-way ANOVA analysis.

Membrane 1

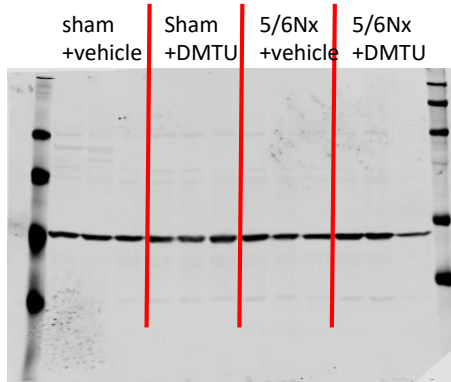

Membrane 2

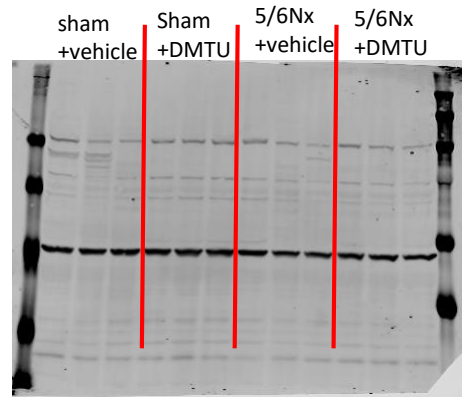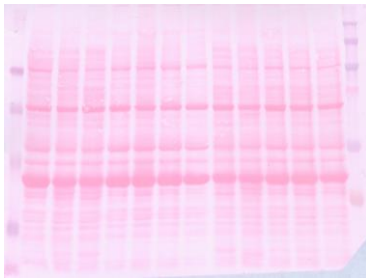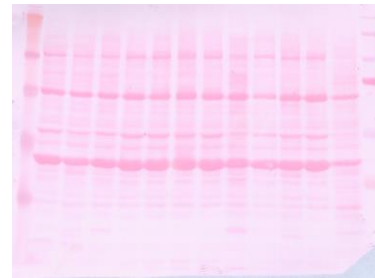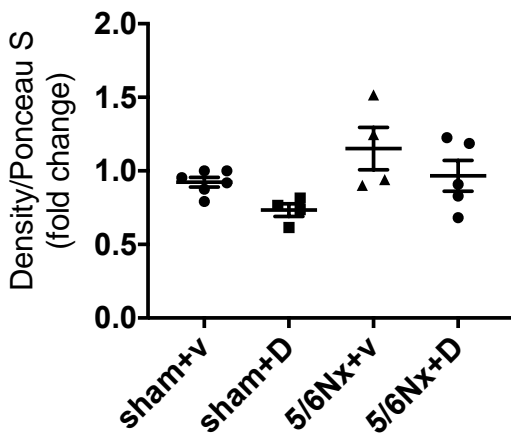

Supplementary Figure 4:

Western blot of lysates from sham/vehicle, sham/DMTU, 5/6Nx/vehicle or 5/6Nx/DMTU mouse hearts probed for urea transport proteins. UT protein amount has a tendency to be decreased in 5/6Nx/DMTU treated mice compared with 5/6Nx/vehicle treated mice, but is not statistically different.
